# Supplementary material for: A stable Mn(ii) coordination polymer demonstrating proton conductivity and quantitative sensing of oxytetracycline in aquaculture
Source: Royal Society of Chemistry journal article supplement (doi:10.1039/d3dt03882c), 2024-01-01
Supplement: d3dt03882c1.pdf [file d3dt03882c1.pdf]

## Electronic Supplementary Information

### **Stable Mn(II) Coordination Polymers Demonstrating Proton Conductivity and Quantitative Sensing of Oxytetracycline in Aquaculture**

Xu Zhang,<sup>a</sup> Yana Zhang,<sup>a</sup> Xin Li,<sup>a</sup> Jiahui Yu,<sup>a</sup> Weijia Chi,<sup>a</sup> Zikang Wang,<sup>a</sup> Hanwen Zheng,<sup>a</sup>  
Zhengang Sun\*<sup>a</sup>, Yanyu Zhu\*<sup>a</sup>, Chengqi Jiao\*<sup>a, b</sup>

<sup>a</sup> School of Chemistry and Chemical Engineering, Liaoning Normal University, Dalian 116029, P. R. China

<sup>b</sup> State Key Laboratory of Fine Chemicals, Dalian University of Technology, Dalian 116024, P. R. China.

*E-mail:* [szg188@163.com](mailto:szg188@163.com), [summeryyzhu@163.com](mailto:summeryyzhu@163.com), [jiaochengqi1989@163.com](mailto:jiaochengqi1989@163.com)

## CONTENTS:

|                                                                                                                                                                                                   |    |
|---------------------------------------------------------------------------------------------------------------------------------------------------------------------------------------------------|----|
| <b>Fig. S1.</b> IR spectrum of <b>Mn-CP</b> .....                                                                                                                                                 | 4  |
| <b>Fig. S2.</b> PXRD spectra of <b>Mn-CP</b> .....                                                                                                                                                | 4  |
| <b>Fig. S3.</b> PXRD patterns of <b>Mn-CP</b> soaked in hot deionized water for 6 h and soaked in deionized water for 24 h (a) and soaked in H <sub>2</sub> O with different pH for 24 h (b)..... | 5  |
| <b>Fig. S4.</b> TG curve of <b>Mn-CP</b> .....                                                                                                                                                    | 5  |
| <b>Fig. S5.</b> Nyquist plots of <b>Mn-CP</b> at 75-95% RH and 348 K.....                                                                                                                         | 6  |
| <b>Fig. S6.</b> The recyclable performances of proton conduction of <b>Mn-CP</b> under different temperatures (348 – 368 K, 95% RH) (a), and within 15 h (368 K, 95% RH) (b).....                 | 6  |
| <b>Fig. S7.</b> Solid–state luminescent spectra of H <sub>2</sub> L (a) and <b>Mn-CP</b> (b).....                                                                                                 | 7  |
| <b>Fig. S8.</b> The plot of the emission intensities of <b>Mn-CP</b> vs the concentrations of OTC.....                                                                                            | 7  |
| <b>Fig. S9.</b> The intensities of <b>Mn-CP</b> among various substances.....                                                                                                                     | 8  |
| <b>Fig. S10.</b> The luminescent intensities at 413 nm of <b>Mn-CP</b> after the addition of OTC at different times.....                                                                          | 8  |
| <b>Fig. S11.</b> The recyclable study of <b>Mn-CP</b> towards OTC.....                                                                                                                            | 9  |
| <b>Fig. S12.</b> PXRD patterns of <b>Mn-CP</b> after five recycles of sensing for OTC.....                                                                                                        | 9  |
| <b>Fig. S13.</b> PXRD patterns of <b>Mn-CP</b> before and after detection of OTC.....                                                                                                             | 10 |
| <b>Fig. S14.</b> IR spectra of <b>Mn-CP</b> before and after detection of OTC.....                                                                                                                | 10 |
| <b>Fig. S15.</b> Emission decay profiles of <b>Mn-CP</b> suspensions before and after sensing of OTC .....                                                                                        | 11 |
| <b>Fig. S16.</b> UV–vis absorption spectra of <b>Mn-CP</b> , organic antibiotics and excitation spectrum of <b>Mn-CP</b> .....                                                                    | 11 |

|                                                                                                                                                               |    |
|---------------------------------------------------------------------------------------------------------------------------------------------------------------|----|
| <b>Fig. S17.</b> UV–vis spectra of <b>Mn-CP</b> in the presence of various concentrations (0–10 $\mu\text{M}$ ) of OTC solutions.....                         | 12 |
| <b>Fig. S18.</b> HOMO and LUMO energy levels of the OTC and the H <sub>2</sub> L calculated by density functional theory (DFT) at B3LYP/6–31G* basis set..... | 12 |
| <b>Table S1.</b> Crystal data and structure refinements for <b>Mn-CP</b> .....                                                                                | 13 |
| <b>Table S2.</b> Selected bond lengths ( $\text{\AA}$ ) and angles ( $^\circ$ ) for <b>Mn-CP</b> .....                                                        | 14 |
| <b>Table S3.</b> Compositions of proton conductivity with different MOF materials.....                                                                        | 15 |
| <b>Table S4.</b> Comparison of the proposed sensor for OTC detection with other methods .....                                                                 | 15 |
| <b>Table S5.</b> Luminescent lifetimes of <b>Mn-CP</b> before and after sensing OTC.....                                                                      | 15 |

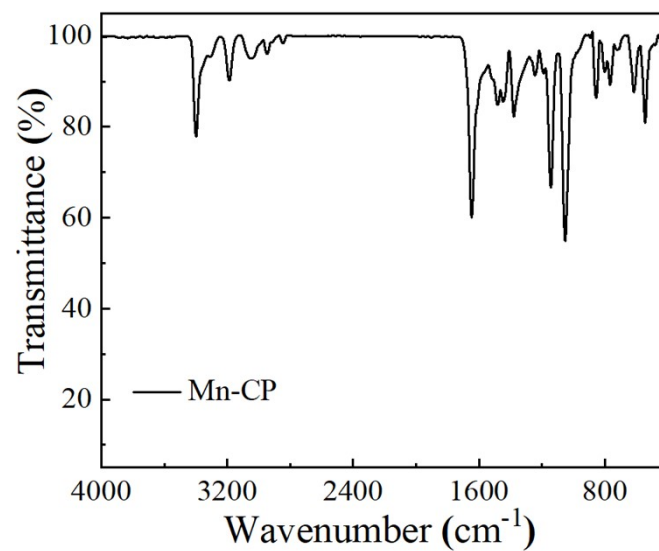

**Fig. S1.** IR spectrum of **Mn-CP**.

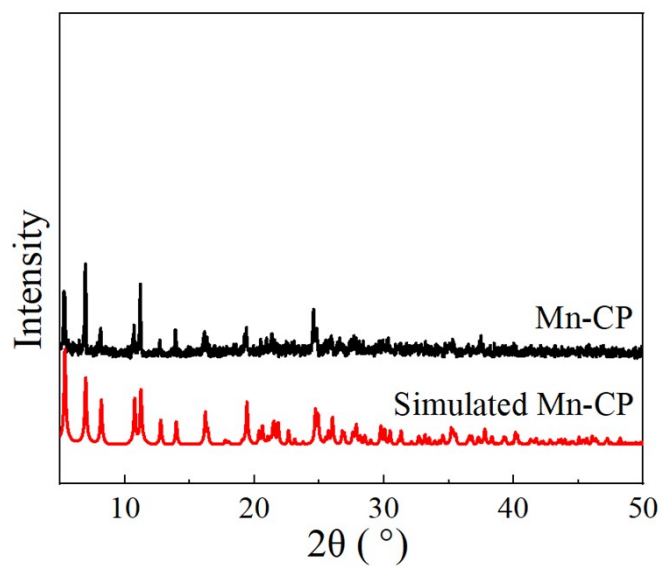

**Fig. S2.** PXRD pattern of **Mn-CP**.

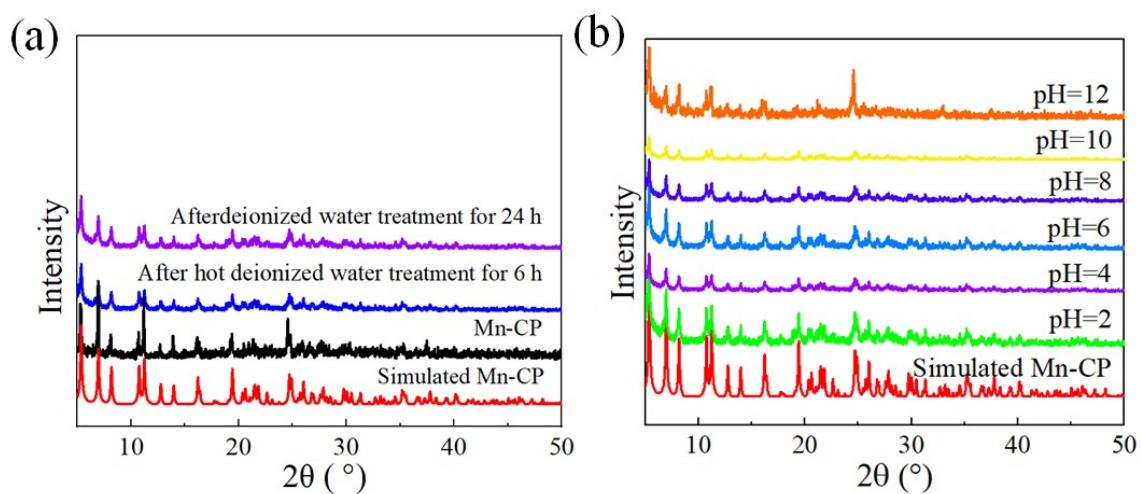

**Fig. S3.** PXRD patterns of Mn-CP soaked in hot deionized water for 6 h and soaked in deionized water for 24 h (a) and soaked in H<sub>2</sub>O with different pH for 24 h (b).

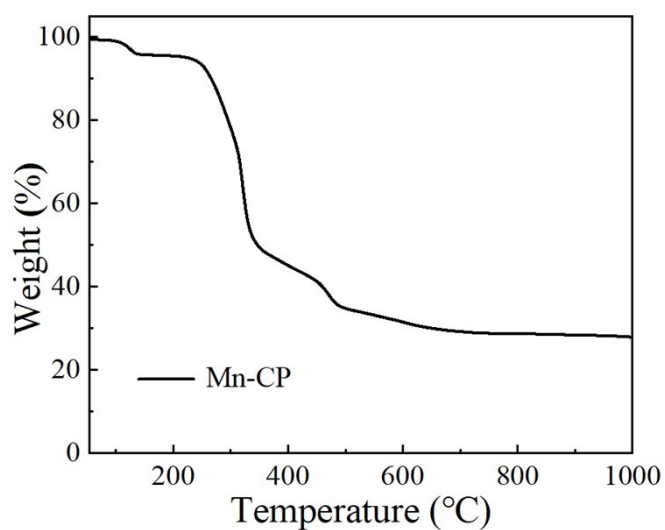

**Fig. S4.** TG curve of Mn-CP.

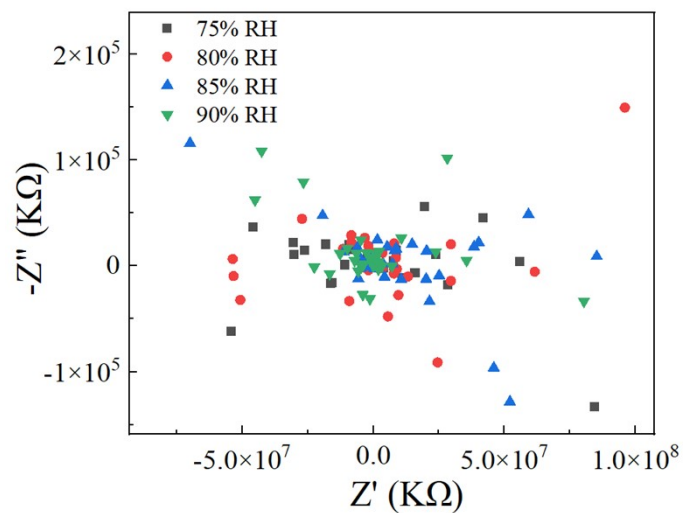

**Fig. S5.** Nyquist plots of **Mn-CP** at 75-95% RH and 348 K.

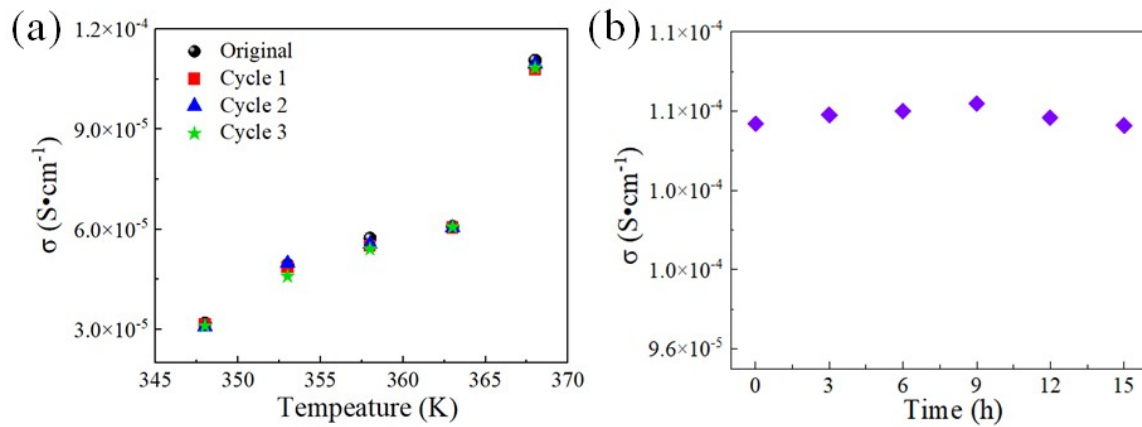

**Fig. S6.** The recyclable performances of proton conduction of **Mn-CP** under different temperatures (348 – 368 K, 95% RH) (a), and within 15 h (368 K, 95% RH) (b).

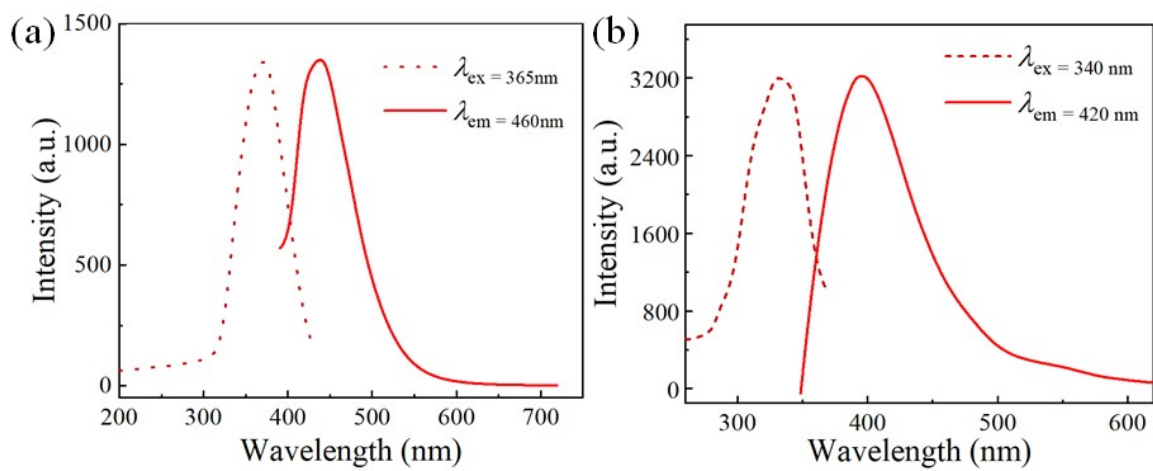

**Fig. S7.** Solid-state luminescent spectra of H<sub>2</sub>L (a) and Mn-CP (b).

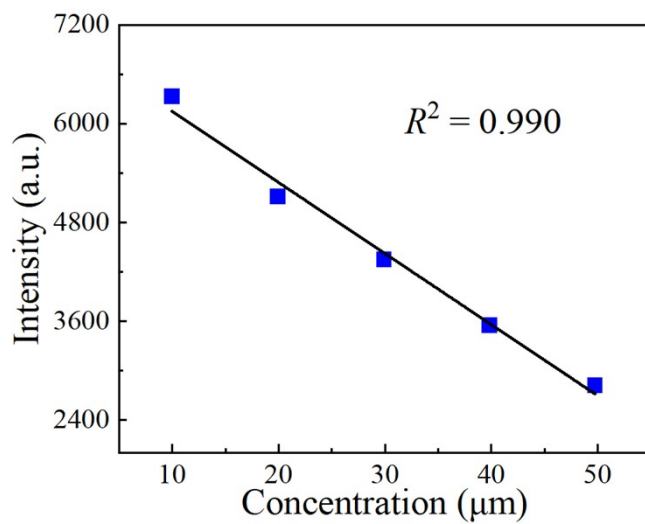

**Fig. S8.** Plot of the emission intensities of Mn-CP vs the concentrations of OTC.

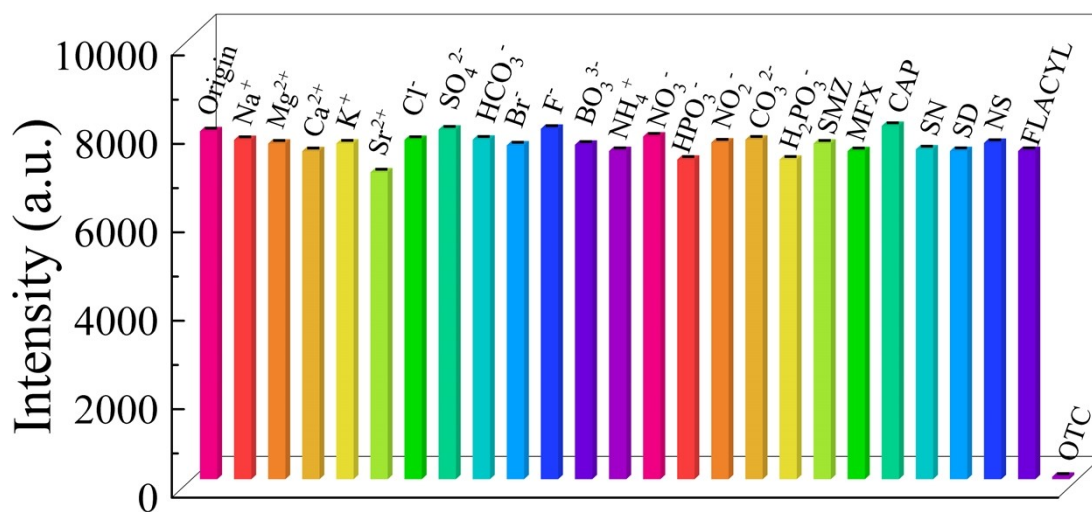

Fig. S9. The luminescent intensities at 413 nm of Mn-CP among various substances.

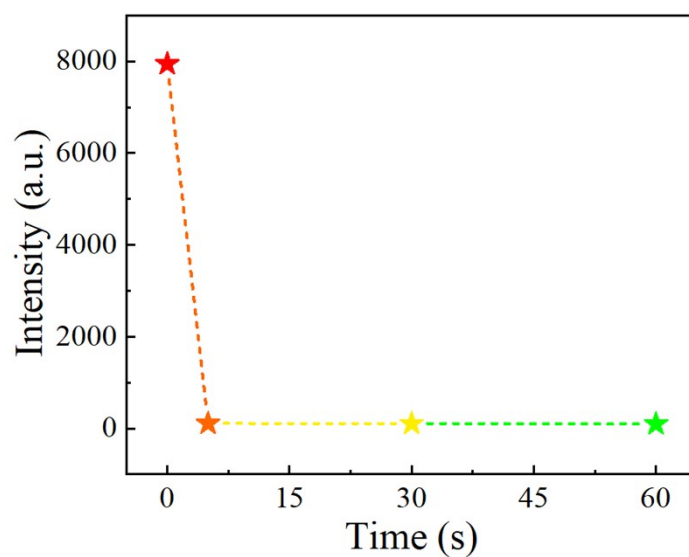

Fig. S10. The luminescent intensities at 413 nm of Mn-CP after the addition of OTC at different times



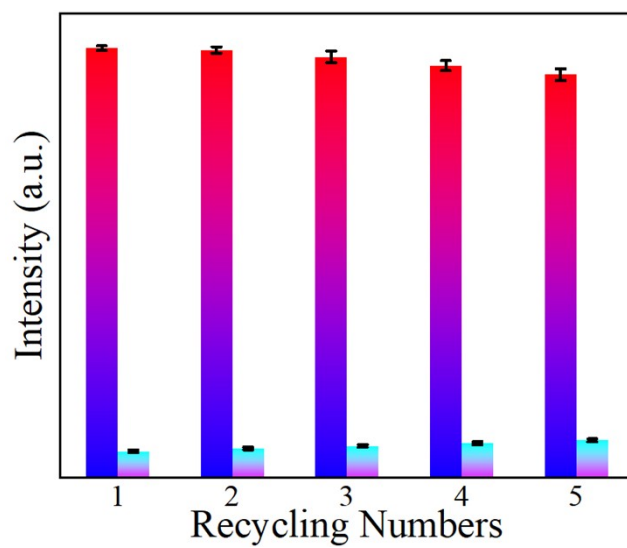

**Fig. S11.** The recyclable study of **Mn-CP** towards OTC

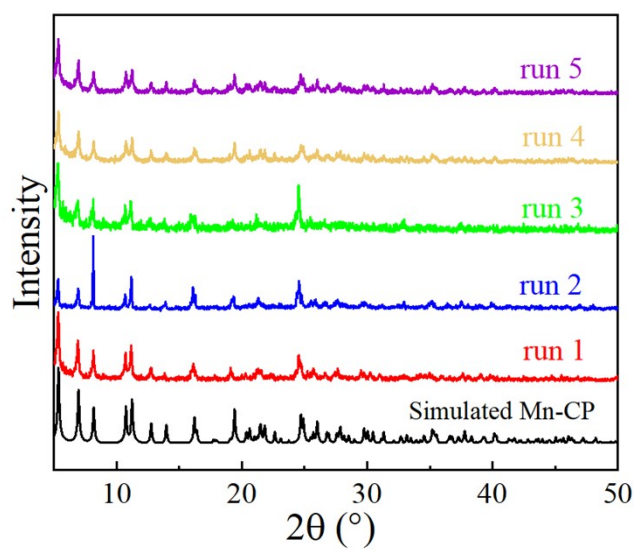

**Fig. S12.** PXRD patterns of **Mn-CP** after five recycles of sensing for OTC.

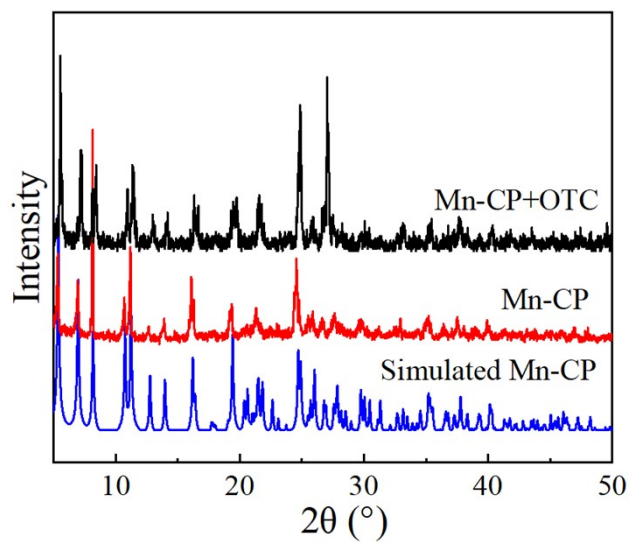

**Fig. S13.** PXRD patterns of **Mn-CP** before and after detection of OTC.

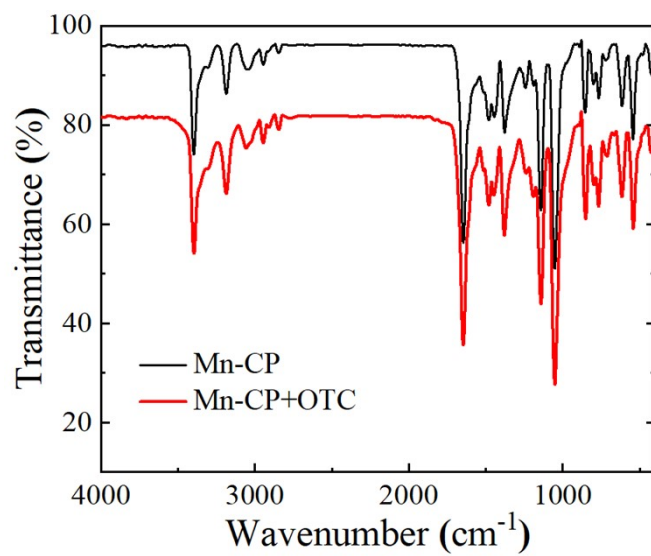

**Fig. S14.** IR spectra of **Mn-CP** before and after detection of OTC.

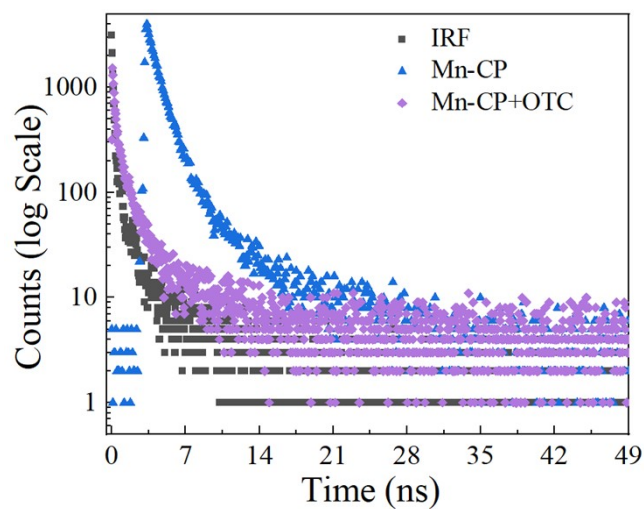

**Fig. S15.** Emission decay profiles of **Mn-CP** suspensions before and after sensing of OTC.

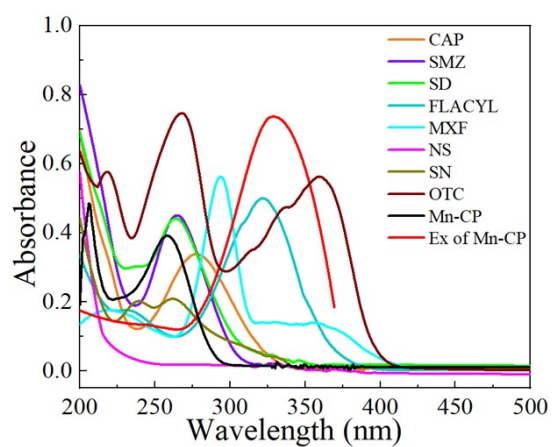

**Fig. S16.** UV-vis absorption spectra of **Mn-CP**, organic antibiotics and excitation spectrum of **Mn-CP**.

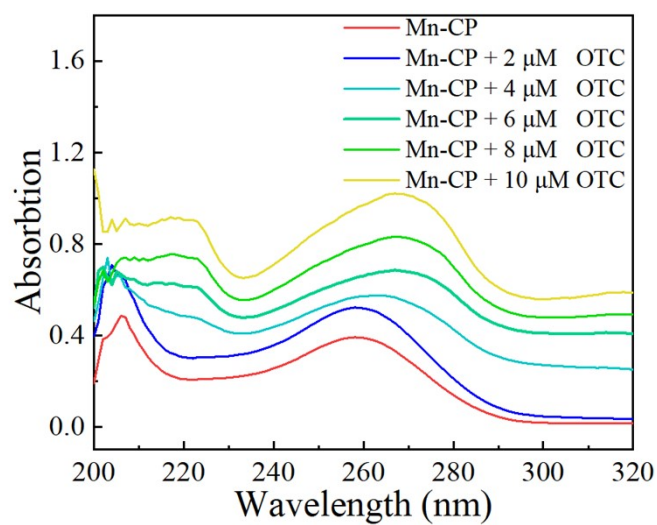

**Fig. S17.** UV-vis spectra of **Mn-CP** in the presence of various concentrations (0–10  $\mu\text{M}$ ) of OTC solutions.

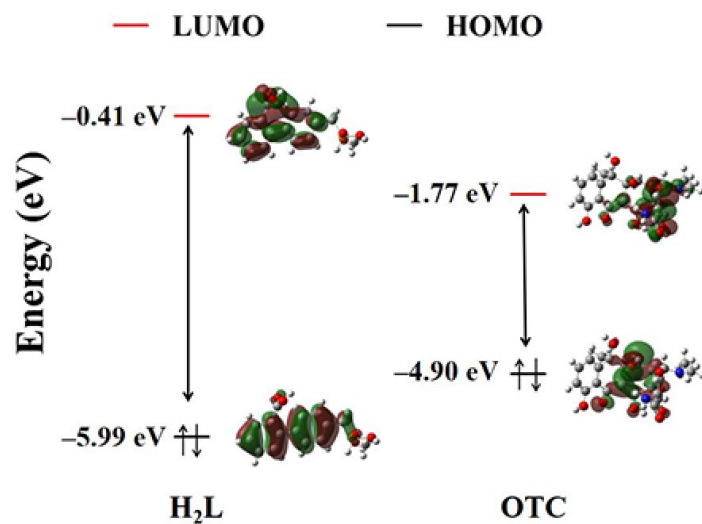

**Fig. S18.** HOMO and LUMO energy levels of the OTC and the H<sub>2</sub>L calculated by density functional theory (DFT) at B3LYP/6–31G\* basis set.

**Table S1.** Crystal data and structure refinements for **Mn-CP**.

| Compound                                                                                     | <b>Mn-CP</b>                                                       |
|----------------------------------------------------------------------------------------------|--------------------------------------------------------------------|
| Empirical formula                                                                            | C <sub>15</sub> H <sub>14</sub> Mn <sub>0.5</sub> O <sub>5</sub> P |
| Formula weight                                                                               | 332.70                                                             |
| Crystal system                                                                               | Orthorhombic                                                       |
| Space group                                                                                  | <i>P</i> nna                                                       |
| <i>a</i> /Å                                                                                  | 5.1416(6)                                                          |
| <i>b</i> /Å                                                                                  | 25.327(3)                                                          |
| <i>c</i> /Å                                                                                  | 21.599(3)                                                          |
| $\alpha$ /°                                                                                  | 90                                                                 |
| $\beta$ /°                                                                                   | 90                                                                 |
| $\gamma$ /°                                                                                  | 90                                                                 |
| <i>V</i> /Å <sup>3</sup>                                                                     | 2812.6(6)                                                          |
| <i>Z</i>                                                                                     | 8                                                                  |
| $\rho_{\text{calc}}$ /cm <sup>3</sup>                                                        | 1.571                                                              |
| $\mu$ /mm <sup>-1</sup>                                                                      | 5.421                                                              |
| <i>F</i> (000)                                                                               | 1372                                                               |
| Reflections collected                                                                        | 10314                                                              |
| Independent reflections                                                                      | 2516 [ <i>R</i> <sub>int</sub> = 0.0751]                           |
| Completeness                                                                                 | 100%                                                               |
| Goodness of fit on <i>F</i> <sup>2</sup>                                                     | 1.069                                                              |
| [ <sup>a</sup> ] <i>R</i> <sub>1</sub> , <i>wR</i> <sub>2</sub> [ <i>I</i> > 2σ( <i>I</i> )] | 0.0617, 0.1473                                                     |
| [ <sup>a</sup> ] <i>R</i> <sub>1</sub> , <i>wR</i> <sub>2</sub> (all data)                   | 0.0811, 0.1597                                                     |

---

[<sup>a</sup>]  $R_1 = \Sigma (|F_0| - |F_C|) / \Sigma |F_0|$ ;  $wR_2 = [\Sigma w (|F_0| - |F_C|)^2 / \Sigma w F_0^2]^{1/2}$

**Table S2.** Selected bond lengths (Å) and angles (°) for **Mn-CP**.

|                                        |            |
|----------------------------------------|------------|
| Mn1–Mn1 <sup>1</sup>                   | 3.1634(12) |
| Mn1–Mn1 <sup>2</sup>                   | 3.1634(12) |
| Mn1–O1                                 | 2.092(3)   |
| Mn1–O1 <sup>3</sup>                    | 2.092(3)   |
| Mn1–O2 <sup>4</sup>                    | 2.175(3)   |
| Mn1–O2 <sup>1</sup>                    | 2.289(3)   |
| Mn1–O2 <sup>5</sup>                    | 2.175(3)   |
| Mn1–O2 <sup>6</sup>                    | 2.289(3)   |
| Mn1 <sup>1</sup> –Mn1–Mn1 <sup>2</sup> | 108.71(6)  |
| O1–Mn1–Mn1 <sup>2</sup>                | 140.60(9)  |
| O1–Mn1–Mn1 <sup>1</sup>                | 83.39(8)   |
| O1 <sup>3</sup> –Mn1–Mn1 <sup>2</sup>  | 83.39(8)   |
| O1 <sup>3</sup> –Mn1–Mn1 <sup>1</sup>  | 140.60(9)  |
| O1 <sup>3</sup> –Mn1–O1                | 111.31(17) |
| O1–Mn1–O2 <sup>4</sup>                 | 84.80(11)  |
| O1 <sup>3</sup> –Mn1–O2 <sup>4</sup>   | 162.93(11) |
| O1 <sup>3</sup> –Mn1–O2 <sup>5</sup>   | 96.78(11)  |
| O1–Mn1–O2 <sup>5</sup>                 | 85.86(11)  |
| O1–Mn1–O2 <sup>6</sup>                 | 96.78(11)  |
| O1–Mn1–O2 <sup>1</sup>                 | 162.93(11) |
| O1 <sup>3</sup> –Mn1–O2 <sup>1</sup>   | 84.80(11)  |
| O1 <sup>3</sup> –Mn1–O2 <sup>6</sup>   | 85.86(11)  |
| O2 <sup>4</sup> –Mn1–Mn1 <sup>1</sup>  | 43.45(8)   |
| O2 <sup>1</sup> –Mn1–Mn1 <sup>1</sup>  | 80.34(8)   |
| O2 <sup>6</sup> –Mn1–Mn1 <sup>2</sup>  | 46.34(7)   |
| O2 <sup>1</sup> –Mn1–Mn1 <sup>2</sup>  | 43.45(8)   |
| O2 <sup>5</sup> –Mn1–Mn1 <sup>2</sup>  | 130.02(9)  |
| O2 <sup>4</sup> –Mn1–Mn1 <sup>2</sup>  | 80.34(8)   |
| O2 <sup>5</sup> –Mn1–Mn1 <sup>1</sup>  | 46.34(7)   |
| O2 <sup>6</sup> –Mn1–Mn1 <sup>1</sup>  | 130.02(9)  |
| O2 <sup>1</sup> –Mn1–O2 <sup>4</sup>   | 79.86(15)  |
| O2 <sup>5</sup> –Mn1–O2 <sup>4</sup>   | 89.79(11)  |
| O2 <sup>6</sup> –Mn1–O2 <sup>1</sup>   | 89.79(11)  |
| O2 <sup>6</sup> –Mn1–O2 <sup>4</sup>   | 86.64(10)  |
| O2 <sup>5</sup> –Mn1–O2 <sup>1</sup>   | 86.64(10)  |
| O2 <sup>5</sup> –Mn1–O2 <sup>6</sup>   | 175.34(16) |

Symmetry transformations used to generate equivalent atoms: #1 1–x, 1–y, 1–z; #2 –x, 1–y, 1–z;  
#3 1/2–x, 1–y, +z; #4 3/2–x, 1–y, +z; #5 –1+x, +y, +z; #6 –1/2+x, +y, 1–z.

**Table S3.** Compositions of proton conductivity with different CPs materials.

| Compounds                                                                                                                                                                                     | $\sigma$ (S cm <sup>-1</sup> )          | conditions          | $E_a$ (eV)  | Ref.             |
|-----------------------------------------------------------------------------------------------------------------------------------------------------------------------------------------------|-----------------------------------------|---------------------|-------------|------------------|
| (Hdmbpy)[Dy(H <sub>2</sub> dobdc) <sub>2</sub> (H <sub>2</sub> O)]·3H <sub>2</sub> O                                                                                                          | $1.20 \times 10^{-3}$                   | 80 °C-100% RH       | 0.38        | [S6]             |
| {[Cd <sub>2</sub> (C <sub>2</sub> O <sub>4</sub> )(2,2'-bpy) <sub>2</sub> (H <sub>2</sub> O) <sub>4</sub> ]·L·3H <sub>2</sub> O} <sub>n</sub>                                                 | $2.41 \times 10^{-3}$                   | 85 °C-98% RH        | 0.21        | [S7]             |
| {[Zn <sub>2</sub> (1,2,4,5-BTA)](4,4'-tmdp) <sub>2</sub> ]·5H <sub>2</sub> O} <sub>n</sub>                                                                                                    | $1.09 \times 10^{-4}$                   | 100 °C, 98% RH      | 0.38        | [S8]             |
| {[Zn <sub>2</sub> (1,2,4,5-BTA)(4,4'-tmdp)(H <sub>2</sub> O) <sub>3</sub> ]·2.25H <sub>2</sub> O} <sub>n</sub>                                                                                | $1.44 \times 10^{-4}$                   | 100 °C, 98% RH      | 0.32        | [S8]             |
| Cu <sub>4</sub> (L) <sub>2</sub> (OH) <sub>2</sub> (DMF) <sub>2</sub>                                                                                                                         | $7.40 \times 10^{-4}$                   | 95 °C-95% RH        | 1.32        | [S9]             |
| <b>Mn-CP</b>                                                                                                                                                                                  | <b><math>1.07 \times 10^{-4}</math></b> | <b>95 °C-95% RH</b> | <b>1.42</b> | <b>This work</b> |
| {Cd(1,2,4,5-BTA) <sub>0.5</sub> } <sub>n</sub>                                                                                                                                                | $1.25 \times 10^{-5}$                   | 100 °C, 98% RH      | 0.40        | [S8]             |
| {[Cu(py <sub>2</sub> z)(5-Hsip)(H <sub>2</sub> O) <sub>2</sub> ]·(H <sub>2</sub> O) <sub>2</sub> } <sub>n</sub>                                                                               | $3.50 \times 10^{-5}$                   | 65 °C-95% RH        | 0.35        | [S10]            |
| {[Zn <sub>3</sub> (Htimb) <sub>2</sub> (H <sub>2</sub> timb) <sub>2</sub> (H <sub>2</sub> O) <sub>2</sub> (ZnW <sub>12</sub> O <sub>40</sub> ) <sub>2</sub> ]·2H <sub>2</sub> O} <sub>n</sub> | $2.32 \times 10^{-5}$                   | 85 °C-98% RH        | 0.52        | [S11]            |
| {[Ni(Htimb)(H <sub>2</sub> O) <sub>3</sub> (H <sub>2</sub> W <sub>12</sub> O <sub>40</sub> ) <sub>0.5</sub> ]·3H <sub>2</sub> O} <sub>n</sub>                                                 | $3.38 \times 10^{-5}$                   | 85 °C-98% RH        | 0.16        | [S11]            |
| [Zn(Hssa)(1,4-bib)·H <sub>2</sub> O] <sub>n</sub>                                                                                                                                             | $3.45 \times 10^{-5}$                   | 60 °C-95% RH        | 0.28        | [S12]            |
| [Zn <sub>3</sub> (ssa) <sub>2</sub> (1,4-bib) <sub>3</sub> ·4H <sub>2</sub> O] <sub>n</sub>                                                                                                   | $6.26 \times 10^{-6}$                   | 60 °C-95% RH        | 0.35        | [S12]            |
| [Cd <sub>5</sub> (TCA) <sub>2</sub> (H <sub>2</sub> O) <sub>2</sub> ]·8DMA·16H <sub>2</sub> O                                                                                                 | $1.45 \times 10^{-6}$                   | 80 °C-85% RH        | 0.74        | [S13]            |
| (Imi) <sub>2</sub> [Bi <sub>2</sub> (pzdc) <sub>4</sub> ]·2H <sub>2</sub> O                                                                                                                   | $8.41 \times 10^{-6}$                   | 85 °C-95% RH        | 0.31        | [S14]            |

**Table S4.** Comparison of the proposed sensor for OTC detection with other methods.

| Compounds                                                     | $K_{sv}$ (M <sup>-1</sup> )          | LOD (nM)    | Visual detection | Ref.             |
|---------------------------------------------------------------|--------------------------------------|-------------|------------------|------------------|
| 2[Zn <sub>2</sub> ·L(H <sub>2</sub> O) <sub>2</sub> ]         | –                                    | 1.21        | No               | [S15]            |
| <b>Mn-CP</b>                                                  | <b><math>3.78 \times 10^4</math></b> | <b>4.41</b> | <b>Yes</b>       | <b>This work</b> |
| Ag <sup>+</sup> /Tb <sup>3+</sup> @UiO-66-(COOH) <sub>2</sub> | –                                    | 9.1         | Yes              | [S16]            |
| 2[Cd(H <sub>2</sub> L)·(H <sub>2</sub> O) <sub>2</sub> ]      | –                                    | 25.4        | No               | [S15]            |
| BUT-179                                                       | $2.96 \times 10^5$                   | 25.4        | No               | [S17]            |
| JNU-104                                                       | $1.52 \times 10^4$                   | 29          | Yes              | [S18]            |
| EuUCBA.                                                       | $9.755 \times 10^3$                  | 118         | No               | [S19]            |
| Tb-MOF                                                        | –                                    | 120         | Yes              | [S20]            |
| Eu-MOF                                                        | $3.22 \times 10^4$                   | 130         | Yes              | [S21]            |
| BUT-178                                                       | $8.29 \times 10^4$                   | 205         | No               | [S17]            |
| JNU-205-Eu                                                    | $2.37 \times 10^4$                   | 350         | Yes              | [S22]            |

**Table S5.** Luminescent lifetimes of **Mn-CP** before and after sensing OTC.

| Compounds    | IRF  | $\tau_{\text{before}}$ (ns) | $\tau_{\text{after}}$ (ns) |
|--------------|------|-----------------------------|----------------------------|
| <b>Mn-CP</b> | 0.67 | 2.07                        | 1.82                       |

## Reference

- S1. F. G. Chen, W. Xu, J. Chen, H. P. Xiao, H. Y. Wang, Z. Y. Chen and J. Y. Ge, Dysprosium(III) Metal–Organic Framework Demonstrating Ratiometric Luminescent Detection of pH, Magnetism, and Proton Conduction, *Inorg. Chem.*, **2022**, *61*, 5388-5396.
- S2. B. C. Wang, X. P. Li, B. B. Hao, C. X. Zhang and Q. L. Wang, Dual-Functional Coordination Polymer with High Proton Conductivity and a Low-Detection-Limit Fluorescent Probe, *J. Phys. Chem. B.*, **2021**, *125*, 12627-12635.
- S3. G. Q. Shi, H. W. Wang, Q. X. Wang and G. Li, Water-mediated proton conductive properties of three water-stable metal-organic frameworks constructed by pyromellitic acid, *J. Solid. State. Chem.*, **2022**, *307*, 122874.
- S4. X. Meng, S. Y. Song, X. Z. Song, M. Zhu, S. N. Zhao, L. L. Wu and H. J. Zhang, A tetranuclear copper cluster-based MOF with sulfonate–carboxylate ligands exhibiting high proton conduction properties, *Chem. Commun.*, **2015**, *51*, 8150-8152.
- S5. D. K. Maity, K. Otake, S. Ghosh, H. Kitagawa and D. Ghoshal, Sulfonic Group Functionalized Mixed Ligand Coordination Polymers: Synthesis, Characterization, Water Sorption, and Proton Conduction Studies, *Inorg. Chem.*, **2017**, *56*, 1581-1590.
- S6. L. L. Chen, Y. J. Shi, W. W. Wu, J. X. Wang, Y. M. Li, Y. Bai and D. B. Dang, Three new POM-based coordination polymers with 1,3,5-tris(1-imidazolyl)benzene ligand: syntheses, structures and proton conductivity, *CrystEngComm*, **2022**, *24*, 1556-1563.
- S7. T. Y. Xu, H. J. Nie, J. M. Li and Z. F. Shi, Highly selective sensing of Fe<sup>3+</sup>/Hg<sup>2+</sup> and proton conduction using two fluorescent Zn(ii) coordination polymers, *Dalton Trans.*, **2020**, *49*, 11129-11141.
- S8. Y. Shen, X. F. Yang, H. B. Zhu, Y. Zhao and W. S. Li, A unique 3D metal–organic framework based on a 12-connected pentanuclear Cd(ii) cluster exhibiting proton conduction, *Dalton Trans.*, **2015**, *44*, 14741-14746.
- S9. M. A. A. Al-Nubi, A. M. Hamisu, A. Ariffin, J. F. Zhang, G. K. H. Shimizu, H. Jo, K. M. Ok and A. C. Wibowo, A new bismuth coordination polymer with proton conductivity and orange-red photoluminescence, *J. Coord. Chem.*, **2021**, *74*, 1810-1822.
- S10. F. Sun, H. H. Xie, X. Liu, S. Y. Pang, S. F. Tang and X. L. Xu, Two luminescent phosphonate metal-organic framework as highly efficient and sensitive sensors for the detections of tetracycline antibiotic in aqueous system, *J. Solid. State. Chem.*, **2023**, *322*, 123942.
- S11. T. X. Li, Z. X. Chen, Z. S. Zhao and Z. D. Liu, A portable test strip fabricated of luminescent lanthanide-functionalized metal–organic frameworks for rapid and visual detection of tetracycline antibiotics, *Anal. Methods.*, **2023**, *15*, 4459-4466.



- S12. L. Liu, Q. Chen, J. Lv, Y. P. Li, K. C. Wang and J. R. Li, Stable Metal–Organic Frameworks for Fluorescent Detection of Tetracycline Antibiotics, *Inorg. Chem.*, **2022**, *61*, 8015-8021.
- S13. X. Wu, X. Xiong, J. L. Li, D. Luo, K. Wu, Y. B. Wei, X. Y. Liu, W. G. Lu, D. Li and J. He, An Adenine-Based Biological Metal-Organic Framework as an Efficient Luminescent Sensor for Tetracycline Detection, *Eur. J. Inorg. Chem.*, **2022**, *2022*, e202200278.
- S14. J. X. He, H. Q. Yuan, Y. F. Zhong, X. X. Peng, Y. F. Xia, S. Y. Liu, Q. Fan, J. L. Yang, K. Deng, X. Y. Wang and G. M. Bao, A luminescent Eu<sup>3+</sup>-functionalized MOF for sensitive and rapid detection of tetracycline antibiotics in swine wastewater and pig kidney, *Spectrochim. Acta. A.*, **2022**, *277*, 121252.
- S15. C. Y. Zhang, K. R. Lu, L. R. Li, W. Lei, M. Z. Xia and F. Y. Wang, A water-stabilized Tb-MOF can be used as a sensitive and selective fluorescence sensor for the detection of oxytetracycline hydrochloride, *Spectrochim. Acta. A.*, **2023**, 123379.
- S16. J. J. Hu, K. L. Xie, T. Z. Xiong, M. M. Wang, H. R. Wen, Y. Peng and S. J. Liu, Stable Europium(III) Metal–Organic Framework Demonstrating High Proton Conductivity and Fluorescence Detection of Tetracyclines, *Inorg. Chem.*, **2023**, *62*, 12001-12008.
- S17. K. Wu, X. Y. Liu, Y. L. Huang, M. Xie, X. Xiong, J. Zheng, W. G. Lu and D. Li, Pyrazine functionalization to boost the antenna effect in rare-earth metal–organic frameworks for tetracycline detection, *Inorg. Chem. Front.*, **2022**, *9*, 1714-1721.
